# Supplementary material for: ATP2C1 gene mutations in Hailey–Hailey disease and possible roles of SPCA1 isoforms in membrane trafficking
Source: PubMed Central journal article supplement (PMC5143377; doi:10.1038/cddis.2016.147), 2016-06-09

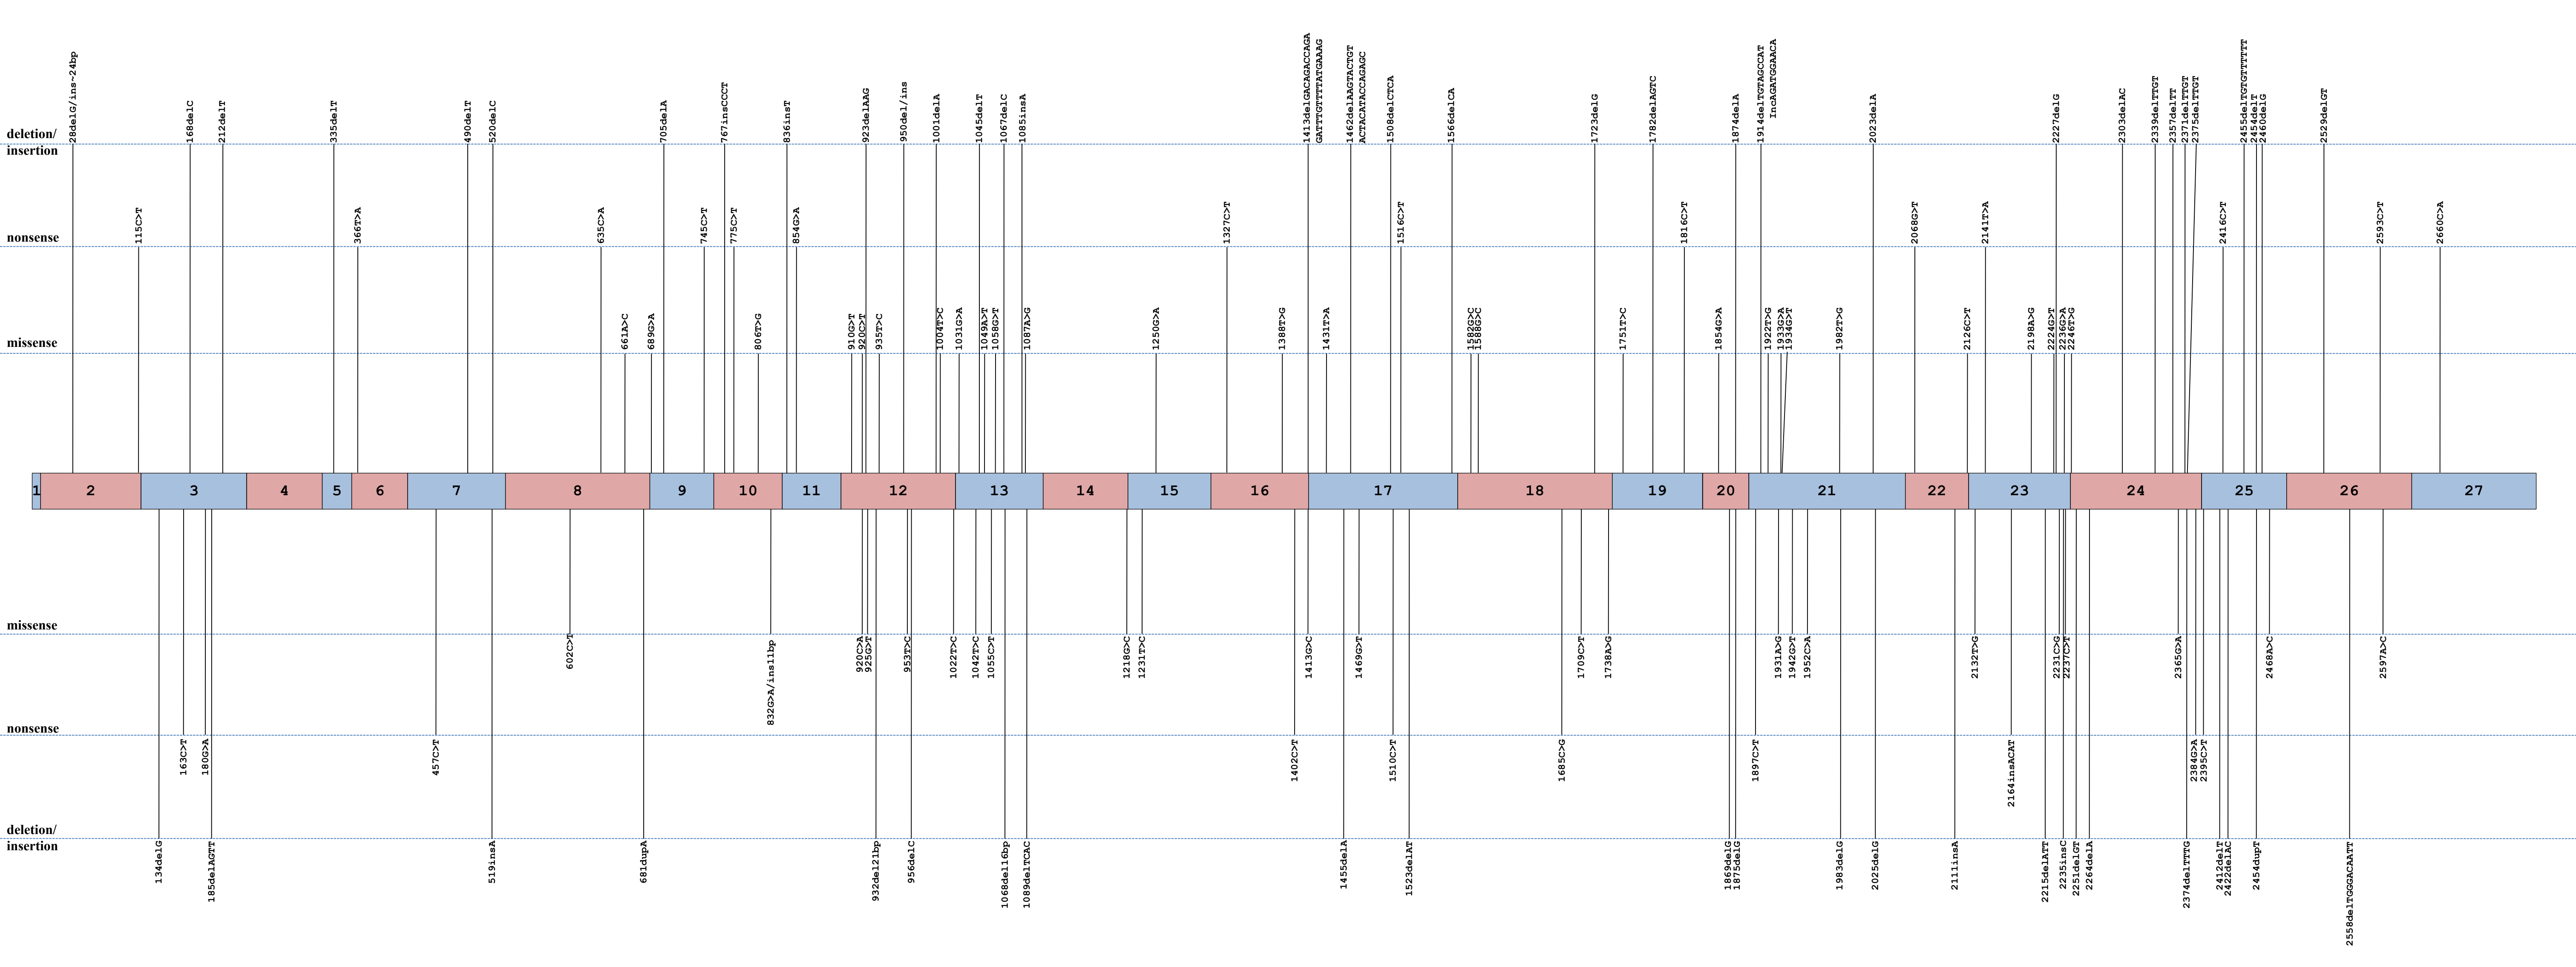

Supplement: cddis2016147x1.pdf [file cddis2016147x1.pdf]
